# Supplementary material for: Complementing thermosteric sea level rise estimates
Source: Copernicus journal article supplement (doi:10.5194/gmd-8-2723-2015), 2015-09-02
Supplement: Supplementary file 1 [file gmd-8-2723-2015-supplement.zip]

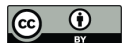

## *Supplement of*

# **Complementing thermosteric sea level rise estimates**

**K. Lorbacher et al.**

*Correspondence to:* K. Lorbacher ([katja.dommenget@unimelb.edu.au](mailto:katja.dommenget@unimelb.edu.au))

- [gmd-8-2723-2015-supplement-title-page.pdf](#)
- [SUPP\\_v19aug15.pdf](#)
- [zostoga.Omon.reproduced.tar.gz](#)

The copyright of individual parts of the supplement might differ from the CC-BY 3.0 licence.
