# Supplementary material for: Complementing thermosteric sea level rise estimates
Source: Copernicus journal article supplement (doi:10.5194/gmd-8-2723-2015), 2015-09-02
Supplement: Supplementary file 2 [file gmd-8-2723-2015-supplement.zip]

AUXILIARY MATERIAL FOR  
**COMPLEMENTING THERMOSTERIC SEA LEVEL RISE ESTIMATES**

BY KATJA LORBACHER<sup>1</sup>, ALEXANDER NAUELS<sup>1</sup>, AND MALTE MEINSHAUSEN<sup>1,2</sup>

GEOSCIENTIFIC MODEL DEVELOPMENT

<sup>1</sup> Australian-German College of Climate & Energy Transitions, The University of Melbourne, Parkville 3010, Victoria, Australia

<sup>2</sup> The Potsdam Institute for Climate Impact Research, Telegraphenberg A26, 14412 Potsdam, Germany

**Table S1:** CMIP5 model and scenario ratio of published versus recalculated *zostoga* time-series for the first realisation (*r1i1p1*) marked by “x” if available and “o” if not available; the bottom line sums up the available models and scenarios.

**Table S2:** Calibration parameters  $c_n=0-5$  for a simplified parameterisation of a thermal expansion coefficient (Equation 3), the sum square error (SSE, in  $10^{-4}$  m<sup>2</sup>) and the RMS-error normalised by the mean value for each CMIP5 model.

**Figure S3:** Time series of observed and simulated rate of global mean yearly thSLR (in mm yr<sup>-1</sup>), cf. Figure 1 in main manuscript. (a/) Simulated thSLR (*zostoga*) relative to year 1990 for seven CMIP5 scenarios: *historical* (31/47), *1pctCO2* (19/32), *abrupt4xCO2* (17/30), *rcp2.6* (18/26), *rcp4.5* (27/40), *rcp6.0* (13/20), *rcp8.5* (27/40); the ratio in brackets indicates the number of models of published (solid lines) *zostoga* and recalculated (dashed lines) *zostoga* in this study based on simulated temperature and salinity fields. Bars indicate the median and its 90% confidence interval for the projected rate of global mean thSLR (in mm yr<sup>-1</sup>) of the four RCP-scenarios in year 2100: *rcp2.6* 1.6 [1.1 to 2.2], *rcp4.5* 2.2 [1.7 to 2.7], *rcp6.0* 2.4 [1.9 to 2.9], *rcp8.5* 3.4 [2.7 to 4.2]. (b/) Observed contribution to yearly thSLR of the upper 700 m by Domingues et al. (2008), Ishii and Kimoto (2009) and Levitus et al. (2012) relative to year 1961 and corresponding simulated time series of the *historical* and *rcp4.5* scenarios, whereby the solid light (dark) grey lines represent the model mean (median). Observed contribution to yearly thSLR from layers (c/) between 700-2000 m by Levitus et al. (2012) and Roemmich and Gilson (2009) and (d/) below 2000 m by Purkey and Johnson (2010) relative to year 1993 (indicating the start of the satellite sea level altimetry period). Corresponding simulated time series are shown as in (b/).

**Table S4.1:** Median and its 90% confidence interval for the constant of proportionality between thermosteric sea level rise (thSLR) and ocean heat uptake (OHU) (in m YJ<sup>-1</sup>, 1YJ = 10<sup>24</sup> J) for different depths intervals for the four RCP scenarios, as well as the historical scenario and the two idealized CO<sub>2</sub>-forcing scenarios. Based on the ensemble of 30%-less CMIP5 models than used here, the constant for global mean (0-D) time series estimated by Kuhlbrodt and Gregory (2012) for *1pctCO2* amounts to 0.11±0.01 m YJ<sup>-1</sup>.

**Table S4.2:** Median and its 90% confidence interval for the constant of proportionality between thSLR and OHU (in  $\text{m YJ}^{-1}$ ,  $1\text{YJ} = 10^{24}\text{ J}$ ) for different depths intervals for the four RCP scenarios, as well as the historical scenario and the two idealized  $\text{CO}_2$ -forcing scenarios. Based on the ensemble of 30%-less CMIP5 models than used here, the constant for global mean (0d) time series estimated by Kuhlbrodt and Gregory (2012) for *IpctCO2* amounts to  $0.11 \pm 0.01\text{ m YJ}^{-1}$ .

**Table S5:** CMIP5 multi-model mean depth and standard deviation (in  $10^{-3}\text{ m}$ ) where the individual model mean and median depth of thSLR originates for the four RCP scenarios, as well as the *historical* scenario and the two idealized  $\text{CO}_2$ -forcing scenarios. Averaged over the four RCP scenarios, the global multi-model median depth is  $490 \pm 90\text{ m}$ , with the range indicating scenario-to-scenario variations.

**Table S1:** CMIP5 model and scenario ratio of published versus recalculated *zostoga* time-series for the first realisation (*rlilp1*) marked by “x” if available and “o” if not available; the bottom line sums up the available models and scenarios.

| Model Name     | Institutional Country  | ID, | Scenario  |            |         |             |        |        |        |        |
|----------------|------------------------|-----|-----------|------------|---------|-------------|--------|--------|--------|--------|
|                |                        |     | piControl | historical | 1pctCO2 | abrupt4xCO2 | rcp2.6 | rcp4.5 | rcp6.0 | rcp8.5 |
| ACCESS1-0      | CSIRO-BOM, Australia   |     | x/x       | x/x        | x/x     | x/x         | o/o    | x/x    | o/o    | x/x    |
| ACCESS1-3      |                        |     | x/x       | x/x        | x/x     | x/x         | o/o    | x/x    | o/o    | x/x    |
| BNU-ESM        | BCC, China             |     | o/x       | o/x        | o/x     | o/x         | o/x    | o/x    | o/o    | o/x    |
| CCSM4          | NCAR, USA              |     | x/x       | x/x        | o/x     | o/x         | x/x    | x/x    | x/x    | x/x    |
| CESM1-BGC      | NSF-DOE-NCAR, USA      |     | o/x       | o/x        | o/x     | o/o         | o/o    | o/x    | o/o    | o/x    |
| CESM1-CAM5     |                        |     | o/x       | o/x        | o/x     | o/o         | o/x    | o/x    | o/x    | o/x    |
| CESM1-CAM5-FV2 |                        |     | o/x       | o/x        | o/o     | o/o         | o/o    | o/o    | o/o    | o/o    |
| CESM1-FASTCHEM |                        |     | o/x       | o/x        | o/o     | o/o         | o/o    | o/o    | o/o    | o/o    |
| CESM1-WACCM    |                        |     | o/x       | o/x        | o/o     | o/o         | o/o    | o/o    | o/o    | o/o    |
| CMCC-CESM      | CMCC, Italy            |     | x/x       | x/x        | o/o     | o/o         | o/o    | o/o    | o/o    | x/x    |
| CMCC-CM        |                        |     | x/x       | x/x        | o/o     | o/o         | o/o    | x/x    | o/o    | x/x    |
| CMCC-CMS       |                        |     | x/x       | x/x        | o/o     | o/o         | o/o    | x/x    | o/o    | x/x    |
| CNRM-CM5       | CNRM-CERFACS, France   |     | x/x       | x/x        | x/x     | x/x         | x/x    | x/x    | o/o    | x/x    |
| CNRM-CM5-2     |                        |     | x/x       | x/x        | x/x     | x/x         | o/o    | o/o    | o/o    | o/o    |
| CSIRO-Mk3-6-0  | CSIRO-QCCCE, Australia |     | x/x       | x/x        | x/x     | x/x         | x/x    | x/x    | x/x    | x/x    |
| CanCM4*        | CCCMA, Canada          |     | o/o       | x/o        | o/o     | o/o         | o/o    | x/o    | o/o    | o/o    |
| CanESM2        |                        |     | x/x       | x/x        | x/x     | x/x         | x/x    | x/x    | o/o    | x/x    |
| EC-EARTH       | EC-EARTH, Europe       |     | o/x       | o/x        | o/o     | o/x         | o/o    | o/x    | o/o    | o/x    |
| FGOALS-g2      | LASG-CESS, China       |     | o/x       | o/x        | o/x     | o/x         | o/x    | o/x    | o/o    | o/x    |
| FGOALS-s2      | LASG-IAP, China        |     | o/x       | o/o        | o/x     | o/x         | o/o    | o/o    | o/o    | o/o    |
| FIO-ESM        | FIO, China             |     | o/x       | o/x        | o/o     | o/o         | o/o    | o/x    | o/x    | o/x    |
| GFDL-CM2p1     | NOAA GFDL, USA         |     | o/o       | o/x        | o/o     | o/o         | o/o    | o/x    | o/o    | o/o    |
| GFDL-CM3       |                        |     | o/x       | o/x        | o/x     | o/x         | o/x    | o/x    | o/x    | o/x    |
| GFDL-ESM2G     |                        |     | o/x       | o/x        | o/x     | o/x         | o/x    | o/x    | o/x    | o/x    |
| GFDL-ESM2M     |                        |     | o/x       | o/x        | o/x     | o/x         | o/x    | o/x    | o/x    | o/x    |
| GISS-E2-H      | NASA GISS, USA         |     | o/x       | o/x        | o/x     | o/x         | o/x    | o/x    | o/x    | o/x    |
| GISS-E2-H-CC   |                        |     | o/x       | o/x        | o/o     | o/o         | o/o    | o/x    | o/o    | o/x    |
| GISS-E2-R      |                        |     | x/x       | x/x        | x/x     | x/x         | x/x    | x/x    | x/x    | x/x    |
| GISS-E2-R-CC   |                        |     | x/x       | x/x        | o/o     | o/o         | o/o    | x/x    | o/o    | x/x    |
| HadGEM2-AO     | NIMR/KMA, Korea        |     | o/o       | o/x        | o/o     | o/o         | o/x    | o/x    | o/x    | o/x    |
| HadCM3         | MOHC, UK               |     | o/o       | o/x        | o/o     | o/o         | o/o    | o/x    | o/o    | o/o    |
| HadGEM2-CC     |                        |     | x/x       | x/x        | o/o     | o/o         | o/o    | x/x    | o/o    | x/x    |
| HadGEM2-ES     |                        |     | x/x       | x/x        | x/x     | x/x         | x/x    | x/x    | x/x    | x/x    |
| IPSL-CM5A-LR   | IPSL, France           |     | x/x       | x/x        | x/x     | x/x         | x/x    | x/x    | x/x    | x/x    |
| IPSL-CM5A-MR   |                        |     | x/x       | x/x        | x/x     | x/x         | x/x    | x/x    | o/o    | x/x    |
| IPSL-CM5B-LR   |                        |     | o/x       | o/x        | o/x     | o/x         | o/o    | o/x    | o/o    | o/x    |
| MIROC-ESM      | MIROC, Japan           |     | x/x       | x/x        | x/x     | x/x         | x/x    | x/x    | x/x    | x/x    |
| MIROC-ESM-CHEM |                        |     | x/x       | x/x        | o/o     | o/o         | x/x    | x/x    | x/x    | x/x    |
| MIROC4h*       | MIROC, Japan           |     | x/o       | x/o        | o/o     | o/o         | o/o    | x/o    | o/o    | o/o    |
| MIROC5         |                        |     | x/x       | x/x        | x/x     | x/x         | x/x    | x/x    | x/x    | x/x    |
| MPI-ESM-LR     | MPI, Germany           |     | x/x       | x/x        | o/x     | o/x         | x/x    | x/x    | o/o    | x/x    |
| MPI-ESM-MR     |                        |     | x/x       | x/x        | x/x     | x/x         | x/x    | x/x    | o/o    | x/x    |
| MPI-ESM-P      |                        |     | x/x       | x/x        | o/x     | o/x         | o/o    | o/o    | o/o    | o/o    |
| MRI-CGCM3      | MRI, Japan             |     | x/x       | x/x        | x/x     | x/x         | x/x    | x/x    | x/x    | x/x    |
| MRI-ESM1       |                        |     | o/o       | x/x        | o/o     | o/o         | o/o    | o/o    | o/o    | x/x    |
| NorESM1-M      | NCC, Norway            |     | x/x       | x/x        | x/x     | x/x         | x/x    | x/x    | x/x    | x/x    |
| NorESM1-ME     |                        |     | x/x       | x/x        | x/x     | o/o         | x/x    | x/x    | x/x    | x/x    |
| bcc-csm1-1     | BCC, China             |     | x/x       | x/x        | x/x     | x/x         | x/x    | x/x    | x/x    | x/x    |
| bcc-csm1-1-m   |                        |     | x/x       | x/x        | x/x     | x/x         | x/x    | x/x    | x/x    | x/x    |
| inmcm4         | INM, Russia            |     | x/x       | x/x        | x/x     | x/x         | o/o    | x/x    | o/o    | x/x    |
| =50            |                        |     | =29/44    | =31/47     | =19/32  | =18/30      | =18/26 | =27/40 | =13/20 | =27/40 |

**Table S2:** Calibration parameters  $c_{n=0-5}$  for a simplified parameterisation of a thermal expansion coefficient (Equation 3), the sum square error (SSE, in  $10^{-4} \text{ m}^2$ ) and the RMS-error normalised by the mean value for each CMIP5 model.

| Model Name     | Institute ID, Country  | Calibration Parameter |        |        |        |         |        | SSE    | NRMSE |
|----------------|------------------------|-----------------------|--------|--------|--------|---------|--------|--------|-------|
|                |                        | c0                    | c1     | c2     | c3     | c4      | c5     |        |       |
| ACCESS1-0      | CSIRO-BOM, Australia   | 66.1702               | 0.8605 | 0.7033 | 0.1815 | 13.6618 | 0.5000 | 0.1392 | 4.3   |
| ACCESS1-3      |                        | 68.1256               | 0.8722 | 0.6865 | 0.1381 | 16.7512 | 0.5000 | 0.1555 | 6.7   |
| BNU-ESM        | BCC, China             | 30.0051               | 1.0907 | 1.2127 | 0.7510 | 39.5652 | 0.5001 | 0.1665 | 3.2   |
| CCSM4          | NCAR, USA              | 69.9441               | 0.7312 | 0.3998 | 0.0002 | 15.3485 | 0.7325 | 0.7839 | 6.0   |
| CESM1-BGC      | NSF-DOE-NCAR, USA      | 52.5531               | 0.8957 | 0.5328 | 0.0000 | 29.7846 | 0.5921 | 0.0320 | 2.1   |
| CESM1-CAM5     |                        | 63.1768               | 0.7830 | 0.6291 | 1.1275 | 29.7090 | 0.7334 | 0.1393 | 3.7   |
| CESM1-CAM5-FV2 |                        | 39.7108               | 1.5778 | 2.9999 | 0.9958 | 30.5517 | 0.5108 | 0.0034 | 17.4  |
| CESM1-FASTCHEM |                        | 39.6641               | 0.8436 | 0.0001 | 0.5658 | 39.8165 | 1.3393 | 0.0024 | 13.9  |
| CESM1-WACCM    |                        | 36.6208               | 1.1734 | 1.3799 | 0.8162 | 35.1718 | 0.8216 | 0.0054 | 7.9   |
| CMCC-CESM      | CMCC, Italy            | 69.3446               | 0.8489 | 0.4933 | 0.0000 | 14.0680 | 0.8307 | 0.0285 | 7.9   |
| CMCC-CM        |                        | 30.0023               | 1.0390 | 0.6318 | 0.0000 | 33.6252 | 0.9716 | 0.0240 | 12.1  |
| CMCC-CMS       |                        | 52.1939               | 0.9058 | 0.4987 | 0.0001 | 26.8729 | 0.8547 | 0.0258 | 8.5   |
| CNRM-CM5       | CNRM-CERFACS, France   | 69.3351               | 0.8441 | 1.0471 | 1.0217 | 19.9257 | 0.5001 | 0.2426 | 3.5   |
| CNRM-CM5-2     |                        | 52.3706               | 0.9451 | 1.0488 | 1.0021 | 28.3298 | 0.7120 | 0.0277 | 2.5   |
| CSIRO-Mk3-6-0  | CSIRO-QCCCE, Australia | 69.9610               | 0.9178 | 1.3079 | 1.2883 | 10.0077 | 1.2572 | 0.8315 | 7.9   |
| CanCM4*        | CCCMA, Canada          |                       |        |        |        |         |        |        |       |
| CanESM2        |                        | 69.9999               | 0.8280 | 0.8679 | 1.1307 | 21.3029 | 0.8229 | 0.2138 | 3.2   |
| EC-EARTH       | EC-EARTH, Europe       | 70.0000               | 0.7342 | 0.4040 | 0.0713 | 14.8863 | 0.8092 | 0.2310 | 6.2   |
| FGOALS-g2      | LASG-CES, China        | 69.9993               | 0.7559 | 0.4361 | 0.1533 | 20.4448 | 0.5038 | 0.1876 | 5.3   |
| FGOALS-s2      | LASG-IAP, China        | 37.6139               | 1.7678 | 4.3999 | 0.0294 | 10.0031 | 0.5942 | 2.0764 | 3.5   |
| FIO-ESM        | FIO, China             | 60.7810               | 0.8378 | 0.4299 | 1.1377 | 28.2507 | 0.5000 | 0.0679 | 4.0   |
| GFDL-CM2p1     | NOAA GFDL, USA         | 30.0014               | 1.1294 | 0.7981 | 0.5789 | 37.4192 | 0.8222 | 0.0095 | 1.4   |
| GFDL-CM3       |                        | 30.0197               | 1.1468 | 1.4562 | 0.8966 | 34.2579 | 0.7782 | 0.3463 | 1.9   |
| GFDL-ESM2G     |                        | 55.8202               | 0.7884 | 0.0000 | 0.0032 | 29.5297 | 0.9572 | 0.2706 | 6.1   |
| GFDL-ESM2M     |                        | 69.9987               | 0.7611 | 0.4611 | 1.2639 | 23.6699 | 0.6449 | 0.2392 | 4.7   |
| GISS-E2-H      | NASA GISS, USA         | 51.7110               | 0.9696 | 1.0742 | 0.9169 | 29.9094 | 0.5000 | 0.0857 | 1.4   |
| GISS-E2-H-CC   |                        | 58.5366               | 0.8919 | 0.5885 | 0.0002 | 27.6031 | 0.8345 | 0.1130 | 2.0   |
| GISS-E2-R      |                        | 47.4595               | 0.8359 | 0.5737 | 1.7317 | 36.2305 | 0.5000 | 0.1997 | 1.8   |
| GISS-E2-R-CC   |                        | 30.0006               | 0.9669 | 0.4508 | 1.2973 | 38.4042 | 0.8826 | 0.0127 | 2.2   |
| HadGEM2-AO     | NIMR/KMA, Korea        | 50.2025               | 1.0094 | 0.9756 | 0.0001 | 28.7180 | 0.5000 | 0.0476 | 1.7   |
| HadCM3         | MOHC, UK               | 53.5790               | 1.1204 | 1.4739 | 1.7653 | 10.0011 | 0.7202 | 0.0033 | 10.9  |
| HadGEM2-CC     |                        | 34.2930               | 1.2163 | 1.5412 | 0.0001 | 27.3219 | 0.8059 | 0.0344 | 4.4   |
| HadGEM2-ES     |                        | 48.5214               | 1.0168 | 1.3568 | 0.8059 | 27.6046 | 0.7220 | 0.5273 | 3.3   |
| IPSL-CM5A-LR   | IPSL, France           | 60.9507               | 1.0268 | 1.3431 | 0.6023 | 10.0016 | 0.6614 | 0.7052 | 7.2   |
| IPSL-CM5A-MR   |                        | 51.7415               | 1.0234 | 0.8728 | 0.0000 | 14.2141 | 0.5001 | 0.1571 | 7.5   |
| IPSL-CM5B-LR   |                        | 69.9999               | 0.8012 | 0.6998 | 1.0521 | 18.5821 | 0.5239 | 0.0645 | 2.2   |
| MIROC-ESM      | MIROC, Japan           | 48.9823               | 0.9760 | 0.9837 | 0.4033 | 28.5333 | 0.5000 | 0.1891 | 0.7   |
| MIROC-ESM-CHEM |                        | 41.7726               | 1.0653 | 1.0743 | 0.0000 | 30.9971 | 0.5432 | 0.0627 | 0.8   |
| MIROC4h*       | MIROC, Japan           |                       |        |        |        |         |        |        |       |
| MIROC5         |                        | 56.0653               | 0.8923 | 0.6888 | 0.8731 | 10.0000 | 1.6042 | 0.1815 | 7.0   |
| MPI-ESM-LR     | MPI, Germany           | 41.9764               | 1.5536 | 3.0000 | 1.6868 | 21.5158 | 1.8395 | 3.2266 | 3.1   |
| MPI-ESM-MR     |                        | 69.9994               | 0.9777 | 1.1201 | 0.3959 | 12.1619 | 0.7649 | 0.3062 | 8.0   |
| MPI-ESM-P      |                        | 47.6048               | 1.5670 | 2.7601 | 0.1597 | 10.0022 | 0.6843 | 0.4684 | 3.0   |
| MRI-CGCM3      | MRI, Japan             | 69.7154               | 0.8299 | 0.5622 | 0.0003 | 10.0001 | 0.5541 | 0.0751 | 3.2   |
| MRI-ESM1       |                        | 32.2583               | 1.1082 | 1.3472 | 1.3510 | 30.0966 | 0.5000 | 0.0237 | 3.9   |
| NorESM1-M      | NCC, Norway            | 30.0007               | 1.1634 | 1.2557 | 0.2615 | 35.2126 | 0.8209 | 0.1405 | 2.0   |
| NorESM1-ME     |                        | 30.0004               | 1.2486 | 1.4890 | 0.1635 | 33.6798 | 0.6718 | 0.0571 | 1.2   |
| bcc-csm1-1     | BCC, China             | 68.9957               | 0.7696 | 0.4575 | 0.0000 | 10.0001 | 0.6921 | 0.4283 | 8.1   |
| bcc-csm1-1-m   |                        | 39.9433               | 1.0834 | 1.0867 | 0.0000 | 21.0694 | 0.9437 | 0.0836 | 3.7   |
| inmcm4         | INM, Russia            | 69.6425               | 0.5120 | 0.0002 | 2.4906 | 39.8744 | 0.5002 | 0.6116 | 12.3  |
| =50            |                        | 52.2368               | 0.9938 | 1.0333 | 0.6065 | 24.2643 | 0.7408 | 0.2928 | 5.1   |

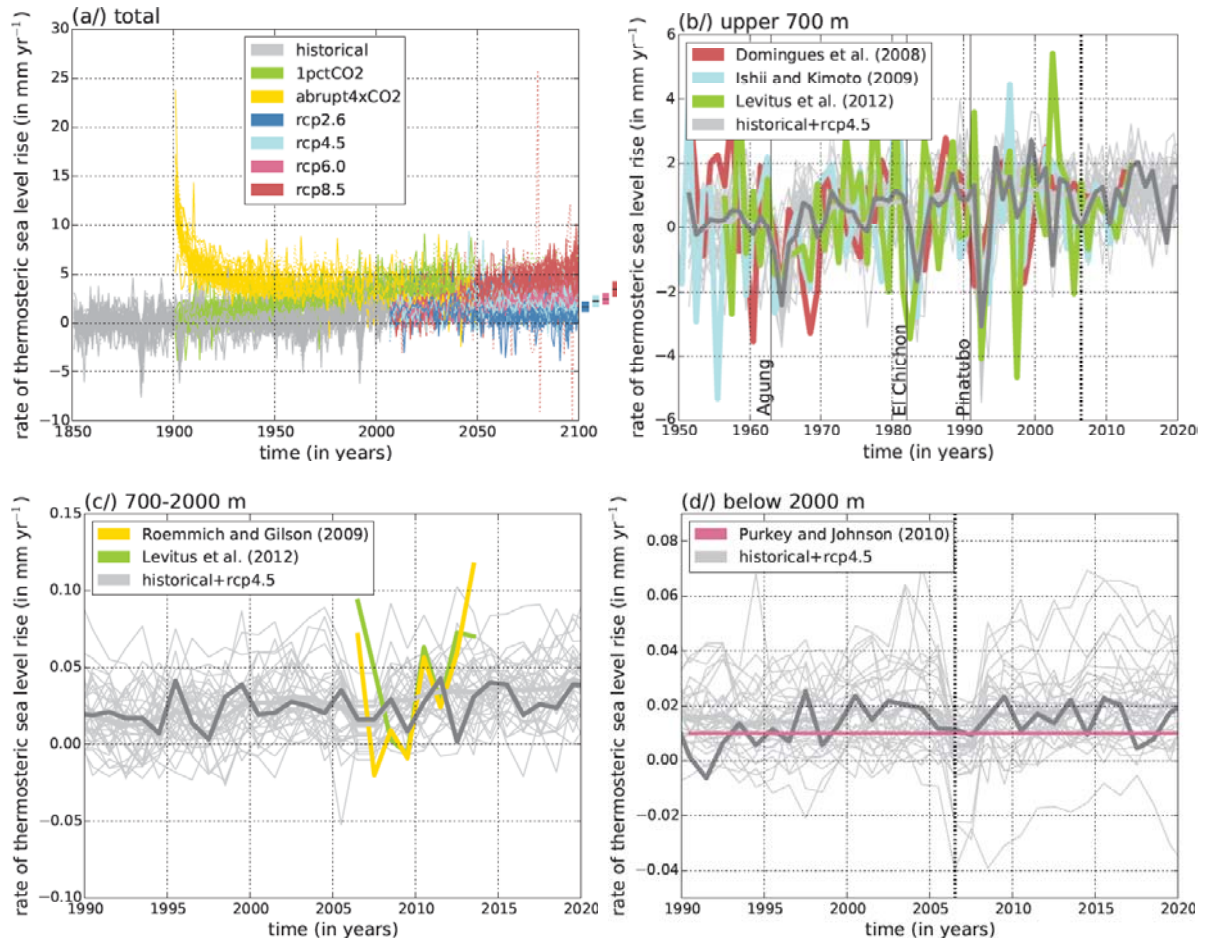

**Figure S3:** Time series of observed and simulated rate of global mean yearly thSLR (in mm yr<sup>-1</sup>), cf. Figure 1 in main manuscript. (a/) Simulated thSLR (zostoga) relative to year 1990 for seven CMIP5 scenarios: *historical* (31/47), *1pctCO2* (19/32), *abrupt4xCO2* (17/30), *rcp2.6* (18/26), *rcp4.5* (27/40), *rcp6.0* (13/20), *rcp8.5* (27/40); the ratio in brackets indicates the number of models of published (solid lines) *zostoga* and recalculated (dashed lines) *zostoga* in this study based on simulated temperature and salinity fields. Bars indicate the median and its 90% confidence interval for the projected rate of global mean thSLR (in mm yr<sup>-1</sup>) of the four RCP-scenarios in year 2100: *rcp2.6* 1.6 [1.1 to 2.2], *rcp4.5* 2.2 [1.7 to 2.7], *rcp6.0* 2.4 [1.9 to 2.9], *rcp8.5* 3.4 [2.7 to 4.2]. (b/) Observed contribution to yearly thSLR of the upper 700 m by Domingues et al. (2008), Ishii and Kimoto (2009) and Levitus et al. (2012) relative to year 1961 and corresponding simulated time series of the *historical* and *rcp4.5* scenarios, whereby the solid light (dark) grey lines represent the model mean (median). Observed contribution to yearly thSLR from layers (c/) between 700-2000 m by Levitus et al. (2012) and Roemmich and Gilson (2009) and (d/) below 2000 m by Purkey and Johnson (2010) relative to year 1993 (indicating the start of the satellite sea level altimetry period). Corresponding simulated time series are shown as in (b/).

**Table S4.1:** Median and its 90% confidence interval for the constant of proportionality between thermosteric sea level rise (thSLR) and ocean heat uptake (OHU) (in m YJ<sup>-1</sup>, 1YJ  $\equiv$  10<sup>24</sup> J) for different depths intervals for the four RCP scenarios, as well as the historical scenario and the two idealized CO<sub>2</sub>-forcing scenarios. Based on the ensemble of 30%-less CMIP5 models than used here, the constant for global mean (0-D) time series estimated by Kuhlbrodt and Gregory (2012) for *1pctCO2* amounts to 0.11 $\pm$ 0.01 m YJ<sup>-1</sup>.

| scenario                                    |                    | rcp8.5                 | rcp6.0                 | rcp4.5                 | rcp2.6                 | historical             | 1pctCO2                | abrupt4xCO2            |
|---------------------------------------------|--------------------|------------------------|------------------------|------------------------|------------------------|------------------------|------------------------|------------------------|
| period                                      |                    | 2006-2100              | 2006-2100              | 2006-2100              | 2006-2100              | 1900-2005              | 1-100                  | 1-100                  |
| epsilon<br>(constant of<br>proportionality) | total              | 0.12<br>[0.11 to 0.13] | 0.12<br>[0.10 to 0.13] | 0.12<br>[0.10 to 0.13] | 0.11<br>[0.09 to 0.12] | 0.12<br>[0.11 to 0.14] | 0.12<br>[0.11 to 0.13] | 0.12<br>[0.11 to 0.13] |
|                                             | upper<br>700m      | 0.14<br>[0.13 to 0.15] | 0.13<br>[0.13 to 0.14] | 0.13<br>[0.12 to 0.14] | 0.13<br>[0.12 to 0.14] | 0.14<br>[0.13 to 0.15] | 0.13<br>[0.13 to 0.14] | 0.14<br>[0.13 to 0.14] |
|                                             | upper<br>700-2000m | 0.09<br>[0.08 to 0.11] | 0.09<br>[0.08 to 0.10] | 0.09<br>[0.08 to 0.11] | 0.09<br>[0.08 to 0.11] | 0.09<br>[0.08 to 0.11] | 0.09<br>[0.08 to 0.10] | 0.10<br>[0.08 to 0.11] |
|                                             | below<br>700m      | 0.10<br>[0.08 to 0.10] | 0.10<br>[0.08 to 0.10] | 0.10<br>[0.09 to 0.11] | 0.10<br>[0.08 to 0.11] | 0.09<br>[0.08 to 0.11] | 0.09<br>[0.09 to 0.10] | 0.10<br>[0.08 to 0.11] |
|                                             | below<br>2000m     | 0.10<br>[0.09 to 0.11] | 0.10<br>[0.09 to 0.11] | 0.10<br>[0.09 to 0.11] | 0.10<br>[0.09 to 0.11] | 0.10<br>[0.08 to 0.12] | 0.10<br>[0.09 to 0.11] | 0.10<br>[0.09 to 0.11] |

**Table S4.2:** Median and its 90% confidence interval for the constant of proportionality between thSLR and OHU (in m YJ<sup>-1</sup>, 1YJ = 10<sup>24</sup> J) for different depths intervals for the four RCP scenarios, as well as the historical scenario and the two idealized CO<sub>2</sub>-forcing scenarios. Based on the ensemble of 30%-less CMIP5 models than used here, the constant for global mean (0d) time series estimated by Kuhlbrodt and Gregory (2012) for *1pctCO2* amounts to 0.11±0.01 m YJ<sup>-1</sup>.

| model name     | scenario | rcp8.5    | rcp6.0    | rcp4.5    | rcp2.6    | historical | 1pctCO2 | abrupt4xCO2 |
|----------------|----------|-----------|-----------|-----------|-----------|------------|---------|-------------|
|                | period   | 2006-2100 | 2006-2100 | 2006-2100 | 2006-2100 | 1900-2005  | 1-100   | 1-100       |
| ACCESS1-0      |          | 0.13      | —         | 0.12      | —         | 0.12       | 0.12    | 0.12        |
| ACCESS1-3      |          | 0.13      | —         | 0.12      | 0.10      | 0.13       | 0.13    | 0.12        |
| BNU-ESM        |          | 0.12      | —         | 0.11      | 0.11      | 0.12       | 0.12    | 0.12        |
| CCSM4          |          | 0.16      | 0.11      | 0.11      | 0.10      | 0.12       | 0.12    | 0.11        |
| CESM1-BGC      |          | 0.12      | —         | 0.11      | 0.00      | 0.12       | 0.12    | —           |
| CESM1-CAM5     |          | 0.12      | 0.12      | 0.11      | 0.11      | 0.12       | 0.12    | —           |
| CESM1-CAM5-FV2 |          | —         | —         | —         | —         | 0.12       | —       | —           |
| CESM1-FASTCHEM |          | —         | —         | —         | —         | 0.12       | —       | —           |
| CESM1-WACCM    |          | —         | —         | —         | —         | 0.12       | —       | —           |
| CMCC-CESM      |          | 0.12      | —         | —         | —         | 0.11       | —       | —           |
| CMCC-CM        |          | 0.12      | —         | 0.12      | —         | 0.13       | —       | —           |
| CMCC-CMS       |          | —         | —         | —         | —         | —          | —       | —           |
| CNRM-CM5       |          | 0.13      | —         | 0.12      | —         | 0.13       | —       | —           |
| CNRM-CM5-2     |          | 0.12      | —         | 0.12      | 0.11      | 0.12       | 0.12    | 0.12        |
| CSIRO-Mk3-6-0  |          | 0.13      | 0.12      | 0.12      | 0.12      | 0.14       | 0.13    | 0.13        |
| CanCM4*        |          | —         | —         | —         | —         | —          | —       | —           |
| CanESM2        |          | 0.13      | —         | 0.12      | 0.11      | 0.14       | 0.13    | 0.13        |
| EC-EARTH       |          | 0.12      | —         | 0.11      | —         | 0.12       | 0.12    | 0.12        |
| FGOALS-g2      |          | 0.11      | —         | 0.10      | 0.10      | 0.13       | 0.13    | 0.12        |
| FGOALS-s2      |          | —         | —         | —         | —         | —          | 0.13    | 0.16        |
| FIO-ESM        |          | 0.13      | 0.12      | 0.11      | —         | 0.12       | —       | —           |
| GFDL-CM2p1     |          | —         | —         | 0.11      | —         | 0.13       | —       | —           |
| GFDL-CM3       |          | 0.13      | 0.12      | 0.12      | 0.12      | 0.13       | 0.12    | 0.13        |
| GFDL-ESM2G     |          | 0.11      | 0.11      | 0.10      | 0.10      | 0.12       | 0.10    | 0.13        |
| GFDL-ESM2M     |          | —         | —         | —         | —         | —          | —       | —           |
| GISS-E2-H      |          | 0.12      | 0.11      | 0.11      | 0.11      | 0.11       | 0.12    | 0.11        |
| GISS-E2-H-CC   |          | 0.12      | —         | 0.11      | —         | 0.13       | —       | —           |
| GISS-E2-R      |          | 0.12      | 0.13      | 0.12      | 0.11      | 0.12       | 0.13    | 0.12        |
| GISS-E2-R-CC   |          | —         | —         | —         | —         | —          | —       | —           |
| HadGEM2-AO     |          | 0.12      | 0.12      | 0.11      | 0.11      | 0.12       | —       | —           |
| HadCM3         |          | —         | —         | 0.12      | —         | 0.14       | —       | —           |
| HadGEM2-CC     |          | 0.12      | —         | 0.11      | —         | 0.12       | —       | —           |
| HadGEM2-ES     |          | 0.12      | 0.12      | 0.11      | 0.11      | 0.13       | 0.12    | 0.12        |
| IPSL-CM5A-LR   |          | 0.12      | 0.11      | 0.11      | 0.11      | 0.13       | 0.12    | 0.12        |
| IPSL-CM5A-MR   |          | 0.12      | —         | 0.11      | 0.10      | 0.11       | 0.12    | 0.12        |
| IPSL-CM5B-LR   |          | 0.13      | —         | 0.12      | —         | 0.11       | 0.12    | 0.12        |
| MIROC-ESM      |          | 0.12      | 0.12      | 0.11      | 0.11      | 0.11       | 0.11    | 0.12        |
| MIROC-ESM-CHEM |          | 0.12      | 0.12      | 0.11      | 0.11      | 0.11       | —       | —           |
| MIROC4h*       |          | —         | —         | —         | —         | —          | —       | —           |
| MIROC5         |          | 0.12      | 0.12      | 0.11      | 0.11      | 0.13       | 0.12    | 0.11        |
| MPI-ESM-LR     |          | 0.12      | —         | 0.11      | 0.11      | 0.11       | 0.13    | 0.12        |
| MPI-ESM-MR     |          | 0.12      | —         | 0.12      | 0.11      | 0.12       | 0.12    | 0.12        |
| MPI-ESM-P      |          | —         | —         | —         | —         | 0.12       | 0.12    | 0.12        |
| MRI-CGCM3      |          | 0.13      | 0.12      | 0.12      | 0.12      | 0.12       | 0.12    | 0.12        |
| MRI-ESM1       |          | 0.13      | —         | —         | —         | 0.13       | —       | —           |
| NorESM1-M      |          | 0.12      | 0.11      | 0.11      | 0.10      | 0.12       | 0.11    | 0.11        |
| NorESM1-ME     |          | 0.11      | 0.11      | 0.11      | 0.10      | 0.12       | 0.11    | —           |
| bcc-csm1-1     |          | 0.12      | 0.12      | 0.12      | 0.18      | 0.12       | 0.12    | 0.12        |
| bcc-csm1-1-m   |          | 0.12      | 0.12      | 0.11      | 0.11      | 0.13       | 0.12    | 0.12        |
| inmcm4         |          | 0.13      | —         | 0.12      | —         | 0.13       | 0.13    | 0.13        |
| =50            |          | 0.12      | 0.12      | 0.11      | 0.11      | 0.12       | 0.12    | 0.12        |

**Table S5:** CMIP5 multi-model mean depth and standard deviation (in  $10^{-3}$  m) where the individual model mean and median depth of thSLR originates for the four RCP scenarios, as well as the *historical* scenario and the two idealized CO<sub>2</sub>-forcing scenarios. Averaged over the four RCP scenarios, the global multi-model median depth is  $490 \pm 90$  m, with the range indicating scenario-to-scenario variations.

| scenario            |        | rcp8.5             | rcp6.0             | rcp4.5             | rcp2.6             | historical         | 1pctCO2            | abrupt4xCO2        |
|---------------------|--------|--------------------|--------------------|--------------------|--------------------|--------------------|--------------------|--------------------|
| period              |        | 2081-2100          | 2081-2100          | 2081-2100          | 2081-2100          | 1986-2005          | 81-100             | 81-100             |
| global              | mean   | 0.70<br>$\pm 0.18$ | 0.83<br>$\pm 0.22$ | 0.84<br>$\pm 0.22$ | 0.95<br>$\pm 0.29$ | 0.99<br>$\pm 0.43$ | 0.44<br>$\pm 0.11$ | 0.57<br>$\pm 0.11$ |
|                     | median | 0.40<br>$\pm 0.15$ | 0.47<br>$\pm 0.15$ | 0.52<br>$\pm 0.18$ | 0.59<br>$\pm 0.23$ | 0.57<br>$\pm 0.44$ | 0.39<br>$\pm 0.11$ | 0.50<br>$\pm 0.10$ |
| northern hemisphere | mean   | 0.61<br>$\pm 0.14$ | 0.72<br>$\pm 0.15$ | 0.73<br>$\pm 0.17$ | 0.83<br>$\pm 0.25$ | 0.99<br>$\pm 0.50$ | 0.37<br>$\pm 0.10$ | 0.50<br>$\pm 0.09$ |
|                     | median | 0.38<br>$\pm 0.14$ | 0.44<br>$\pm 0.13$ | 0.49<br>$\pm 0.16$ | 0.58<br>$\pm 0.21$ | 0.67<br>$\pm 0.57$ | 0.37<br>$\pm 0.11$ | 0.48<br>$\pm 0.09$ |
| southern hemisphere | mean   | 0.80<br>$\pm 0.22$ | 0.96<br>$\pm 0.28$ | 0.96<br>$\pm 0.28$ | 1.07<br>$\pm 0.34$ | 1.04<br>$\pm 0.39$ | 0.52<br>$\pm 0.14$ | 0.65<br>$\pm 0.14$ |
|                     | median | 0.42<br>$\pm 0.18$ | 0.51<br>$\pm 0.18$ | 0.56<br>$\pm 0.22$ | 0.68<br>$\pm 0.26$ | 0.58<br>$\pm 0.40$ | 0.42<br>$\pm 0.14$ | 0.53<br>$\pm 0.12$ |
